# Supplementary material for: Selection of a suitable ZIF-8/ionic liquid (IL) based composite for selective CO2 capture: the role of anions at the interface
Source: Royal Society of Chemistry journal article supplement (doi:10.1039/d0ra07927h), 2020-01-01
Supplement: d0ra07927h1.pdf [file d0ra07927h1.pdf]

## Electronic Supplementary Information

### Selection of suitable ZIF-8/ionic liquid (IL) based composite for the selective CO<sub>2</sub> capture: The role of anions at the interface<sup>‡</sup>

Anoopa Thomas,<sup>†</sup> Rafiq Ahamed<sup>†</sup> and Muthuramalingam Prakash<sup>†,\*</sup>

*<sup>†</sup>Department of Chemistry, Faculty of Engineering and Technology, SRM Institute of Science and Technology, SRM Nagar, Kattankulathur-603203, Chennai TN, India*

---

**\*Corresponding Authors:** M. Prakash: Email: M.P.: [prakashspm@gmail.com](mailto:prakashspm@gmail.com); [prakashm4@srmist.edu.in](mailto:prakashm4@srmist.edu.in);

### Grand Canonical Monte Carlo (GCMC) Simulations:

The force field parameters used for different framework atoms and gas molecules are given in Table S1 and S2.

**Table S1** Force field parameters used for IL@ZIF-8 complexes.

| Atom | UFF              |                | Dreiding FF      |                | GenericMOFs FF   |                |
|------|------------------|----------------|------------------|----------------|------------------|----------------|
|      | $\epsilon_i$ (K) | $\sigma_i$ (Å) | $\epsilon_i$ (K) | $\sigma_i$ (Å) | $\epsilon_i$ (K) | $\sigma_i$ (Å) |
| C    | 52.83            | 3.85           | 47.86            | 3.47           | 47.86            | 3.47           |
| H    | 22.14            | 2.89           | 7.65             | 2.85           | 7.65             | 2.85           |
| N    | 34.72            | 3.66           | 38.95            | 3.26           | 38.95            | 3.26           |
| Zn   | 62.40            | 2.76           | 27.68            | 4.54           | 62.40            | 2.46           |
| O    | 30.19            | 3.50           | 48.16            | 3.03           | 48.16            | 3.03           |
| S    | 137.88           | 4.04           | 173.11           | 3.59           | 173.11           | 3.59           |
| P    | 153.48           | 4.15           | 161.03           | 3.70           | 161.03           | 3.70           |
| Cl   | 114.23           | 3.95           | 142.56           | 3.52           | 142.56           | 3.52           |
| F    | 25.16            | 3.36           | 36.48            | 3.09           | 36.48            | 3.09           |
| B    | 90.58            | 4.08           | 47.81            | 3.58           | 47.81            | 3.58           |

**Table S2** LJ parameters and charges used for gas molecules.

| CO <sub>2</sub> | $\epsilon$ (K) | $\sigma$ (Å) | Charge |
|-----------------|----------------|--------------|--------|
| O               | 79.0           | 3.05         | -0.35  |
| C               | 27.0           | 2.80         | 0.70   |
| O               | 79.0           | 3.05         | -0.35  |

| N <sub>2</sub> | $\epsilon$ (K) | $\sigma$ (Å) | Charge |
|----------------|----------------|--------------|--------|
| N              | 36.0           | 3.31         | -0.482 |
| N_COM          | --             | --           | 0.964  |
| N              | 36.0           | 3.31         | -0.482 |

| CH <sub>4</sub> | Energy $\epsilon$ (K) | Distance $\sigma$ (Å) | Charge |
|-----------------|-----------------------|-----------------------|--------|
| C               | 158.5                 | 3.72                  | --     |

**Table S3** He void for different composites calculated using Dreiding force field.

| Composite                                               | He void |
|---------------------------------------------------------|---------|
| ZIF-8                                                   | 0.48    |
| [BMIM][BF <sub>4</sub> ] <i>@</i> ZIF-8                 | 0.38    |
| [BMIM][PF <sub>6</sub> ] <i>@</i> ZIF-8                 | 0.39    |
| [BMIM][Cl] <i>@</i> ZIF-8                               | 0.40    |
| [BMIM][CF <sub>3</sub> CO <sub>2</sub> ] <i>@</i> ZIF-8 | 0.38    |
| [BMIM][OTf] <i>@</i> ZIF-8                              | 0.38    |
| [BMIM][NO <sub>3</sub> ] <i>@</i> ZIF-8                 | 0.38    |
| [BMIM][TF <sub>2</sub> N] <i>@</i> ZIF-8                | 0.34    |
| [BMIM][DCA] <i>@</i> ZIF-8                              | 0.38    |
| [BMIM][N <sub>3</sub> ] <i>@</i> ZIF-8                  | 0.39    |
| [BMIM][SCN] <i>@</i> ZIF-8                              | 0.38    |
| [BMIM][NO <sub>2</sub> ] <i>@</i> ZIF-8                 | 0.40    |

**Table S4** Calculated atomic charges (average) for ZIF-8 framework with the atom types using charge equilibration method.

| Atom type in ZIF-8 | Charge (a.u.) | 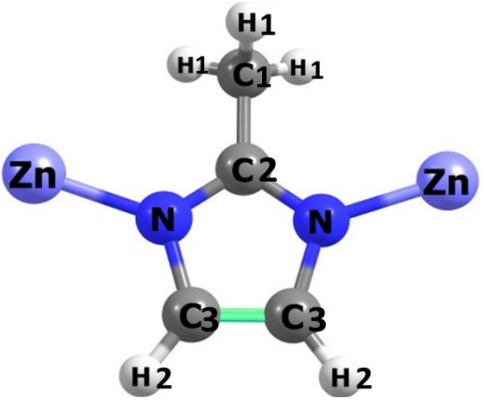 |
|--------------------|---------------|--------------------------------------------------------------------------------------|
| Zn                 | 0.330         |                                                                                      |
| N                  | -0.175        |                                                                                      |
| C1                 | -0.250        |                                                                                      |
| C2                 | 0.158         |                                                                                      |
| C3                 | 0.003         |                                                                                      |
| H1                 | 0.076         |                                                                                      |
| H2                 | 0.019         |                                                                                      |
|                    |               | <b>Atom types considered for ZIF-8 framework</b>                                     |

**Table S5** Average charges for each atom type of non-nitrogen based ILs, calculated using charge equilibration method.

| [BMIM][BF <sub>4</sub> ] |        | [BMIM][PF <sub>6</sub> ] |        | [BMIM][OTf] |        | [BMIM][CF <sub>3</sub> CO <sub>2</sub> ] |        | [BMIM][Cl] |        |
|--------------------------|--------|--------------------------|--------|-------------|--------|------------------------------------------|--------|------------|--------|
| Atom type                | Charge | Atom type                | Charge | Atom type   | Charge | Atom type                                | Charge | Atom type  | Charge |
| N                        | -0.118 | N                        | -0.111 | N           | -0.117 | N                                        | -0.116 | N          | -0.116 |
| C1                       | -0.114 | C1                       | -0.104 | C1          | -0.104 | C1                                       | -0.110 | C1         | -0.113 |
| C2                       | 0.116  | C2                       | 0.097  | C2          | 0.097  | C2                                       | 0.078  | C2         | 0.072  |
| C3                       | 0.025  | C3                       | 0.009  | C3          | 0.010  | C3                                       | 0.006  | C3         | 0.005  |
| C4                       | -0.002 | C4                       | -0.017 | C4          | -0.004 | C4                                       | -0.016 | C4         | -0.015 |
| C5                       | -0.098 | C5                       | -0.077 | C5          | -0.106 | C5                                       | -0.091 | C5         | -0.092 |
| C6                       | -0.021 | C6                       | -0.033 | C6          | -0.012 | C6                                       | -0.027 | C6         | -0.027 |
| C7                       | -0.166 | C7                       | -0.155 | C7          | -0.170 | C7                                       | -0.163 | C7         | -0.163 |
| H1                       | 0.078  | H1                       | 0.063  | H1          | 0.060  | H1                                       | 0.063  | H1         | 0.065  |
| H2                       | 0.063  | H2                       | 0.112  | H2          | 0.053  | H2                                       | 0.055  | H2         | 0.059  |
| H3                       | 0.024  | H3                       | 0.024  | H3          | 0.024  | H3                                       | 0.024  | H3         | 0.024  |
| H4                       | 0.047  | H4                       | 0.069  | H4          | 0.041  | H4                                       | 0.039  | H4         | 0.067  |
| H5                       | 0.083  | H5                       | 0.070  | H5          | 0.083  | H5                                       | 0.052  | H5         | 0.048  |
| H6                       | 0.037  | H6                       | 0.058  | H6          | 0.036  | H6                                       | 0.030  | H6         | 0.027  |
| H7                       | 0.062  | H7                       | 0.061  | H7          | 0.069  | H7                                       | 0.057  | H7         | 0.056  |
| B                        | 2.682  | P                        | 1.006  | S           | 0.316  | C1(anion)                                | 0.755  | Cl         | -0.354 |
| F                        | -0.901 | F                        | -0.393 | C(anion)    | 0.738  | C2(anion)                                | 0.122  |            |        |
|                          |        |                          |        | F           | -0.479 | O                                        | -0.170 |            |        |
|                          |        |                          |        | O           | -0.201 | F                                        | -0.478 |            |        |

**Table S6** Average charges for each atom type of nitrogen based ILs, calculated using charge equilibration method.

| [BMIM][DCA] |        | [BMIM][N <sub>3</sub> ] |        | [BMIM][NO <sub>2</sub> ] |        | [BMIM][NO <sub>3</sub> ] |        | [BMIM][Tf <sub>2</sub> N] |        | [BMIM][SCN] |        |
|-------------|--------|-------------------------|--------|--------------------------|--------|--------------------------|--------|---------------------------|--------|-------------|--------|
| Atom type   | Charge | Atom type               | Charge | Atom type                | Charge | Atom type                | Charge | Atom type                 | Charge | Atom type   | Charge |
| N           | -0.120 | N                       | -0.119 | N                        | -0.118 | N                        | -0.118 | N                         | -0.116 | N           | -0.120 |
| C1          | -0.106 | C1                      | -0.101 | C1                       | -0.110 | C1                       | -0.101 | C1                        | -0.101 | C1          | -0.102 |
| C2          | 0.080  | C2                      | 0.074  | C2                       | 0.076  | C2                       | 0.074  | C2                        | 0.089  | C2          | 0.077  |
| C3          | 0.005  | C3                      | 0.005  | C3                       | 0.005  | C3                       | 0.006  | C3                        | 0.008  | C3          | 0.005  |
| C4          | -0.016 | C4                      | -0.014 | C4                       | -0.015 | C4                       | -0.016 | C4                        | -0.013 | C4          | -0.017 |
| C5          | -0.091 | C5                      | -0.092 | C5                       | -0.092 | C5                       | -0.088 | C5                        | -0.092 | C5          | -0.090 |
| C6          | -0.027 | C6                      | -0.025 | C6                       | -0.027 | C6                       | -0.028 | C6                        | -0.018 | C6          | -0.028 |
| C7          | -0.163 | C7                      | -0.165 | C7                       | -0.163 | C7                       | -0.161 | C7                        | -0.168 | C7          | -0.162 |
| H1          | 0.055  | H1                      | 0.049  | H1                       | 0.061  | H1                       | 0.050  | H1                        | 0.063  | H1          | 0.049  |
| H2          | 0.019  | H2                      | 0.037  | H2                       | 0.038  | H2                       | 0.047  | H2                        | 0.048  | H2          | 0.021  |
| H3          | 0.024  | H3                      | 0.023  | H3                       | 0.024  | H3                       | 0.024  | H3                        | 0.024  | H3          | 0.023  |
| H4          | 0.035  | H4                      | 0.035  | H4                       | 0.032  | H4                       | 0.040  | H4                        | 0.050  | H4          | 0.036  |
| H5          | 0.051  | H5                      | 0.054  | H5                       | 0.049  | H5                       | 0.055  | H5                        | 0.072  | H5          | 0.049  |
| H6          | 0.029  | H6                      | 0.031  | H6                       | 0.028  | H6                       | 0.036  | H6                        | 0.050  | H6          | 0.029  |
| H7          | 0.057  | H7                      | 0.058  | H7                       | 0.085  | H7                       | 0.058  | H7                        | 0.079  | H7          | 0.055  |
| N1          | -0.172 | N1                      | -0.044 | N(anion)                 | -0.011 | N(anion)                 | 0.043  | N(anion)                  | -0.107 | S           | -0.062 |
| N2          | -0.151 | N2                      | -0.086 | O                        | -0.132 | O                        | -0.136 | S                         | 0.261  | C           | 0.067  |
| C           | 0.142  |                         |        |                          |        |                          |        | O                         | -0.169 | N(anion)    | -0.134 |
|             |        |                         |        |                          |        |                          |        | C                         | 0.770  |             |        |
|             |        |                         |        |                          |        |                          |        | F                         | -0.474 |             |        |

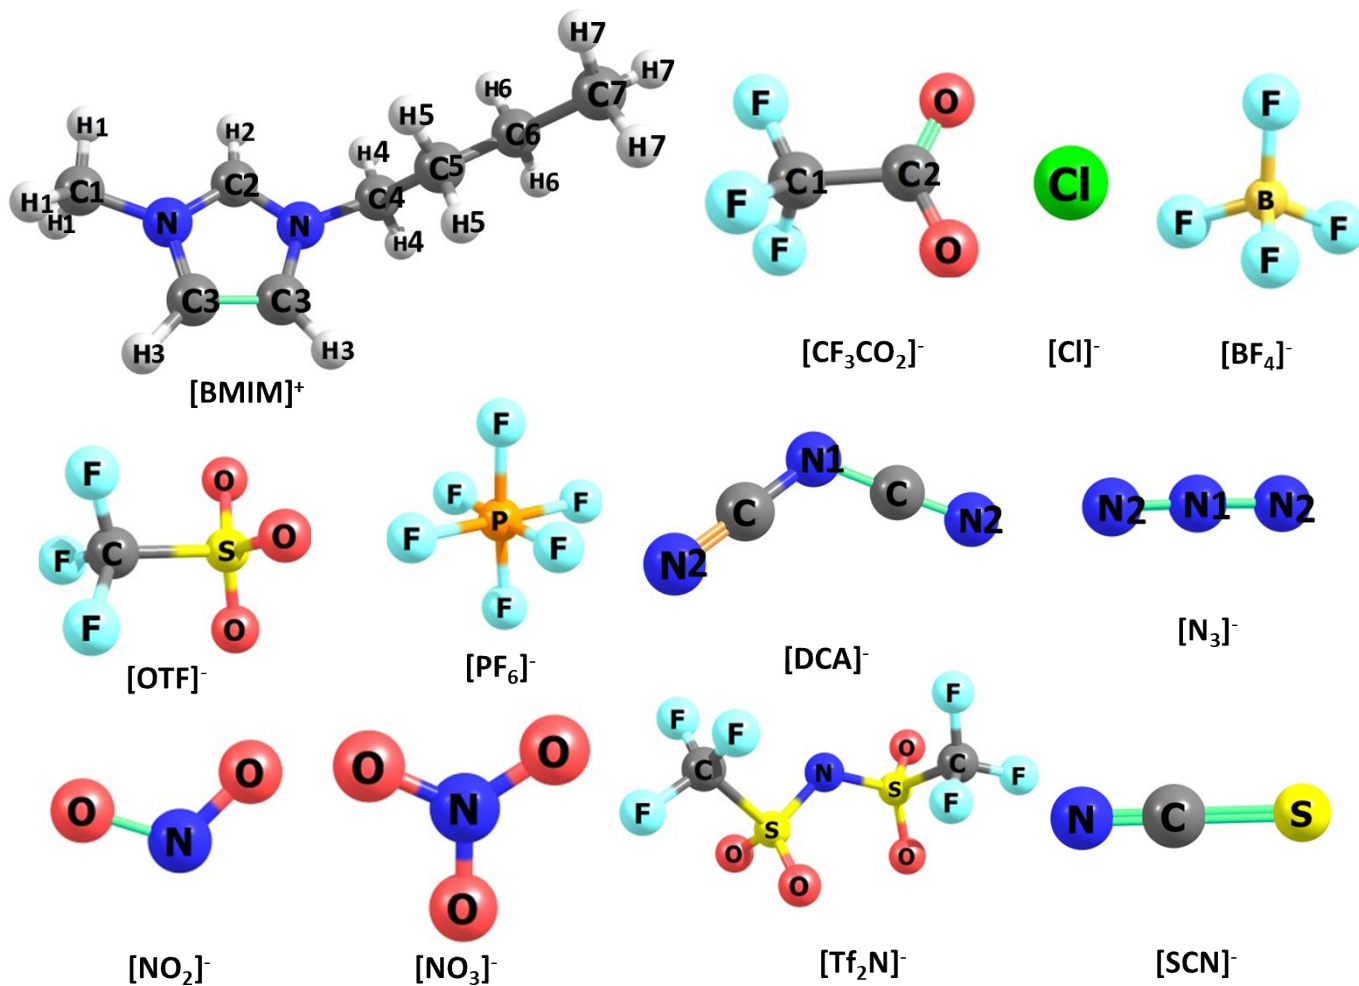

**Fig. S1** Structure of cation ([BMIM]<sup>+</sup>) and various anions used in this study, along with their atom types. The selected anions are trifluoroacetate [CF<sub>3</sub>CO<sub>2</sub>]<sup>-</sup>, tetrafluoroborate [BF<sub>4</sub>]<sup>-</sup>, hexafluorophosphate [PF<sub>6</sub>]<sup>-</sup>, chloride [Cl]<sup>-</sup>, and trifluoromethanesulfonate [OTF]<sup>-</sup> which are non-N based and nitrogen based anions are thiocyanate [SCN]<sup>-</sup>, nitrite [NO<sub>2</sub>]<sup>-</sup>, nitrate [NO<sub>3</sub>]<sup>-</sup>, dicyanamide [DCA]<sup>-</sup>, azide [N<sub>3</sub>]<sup>-</sup>, and bis(trifluoromethylsulfonyl)imide [Tf<sub>2</sub>N]<sup>-</sup>.

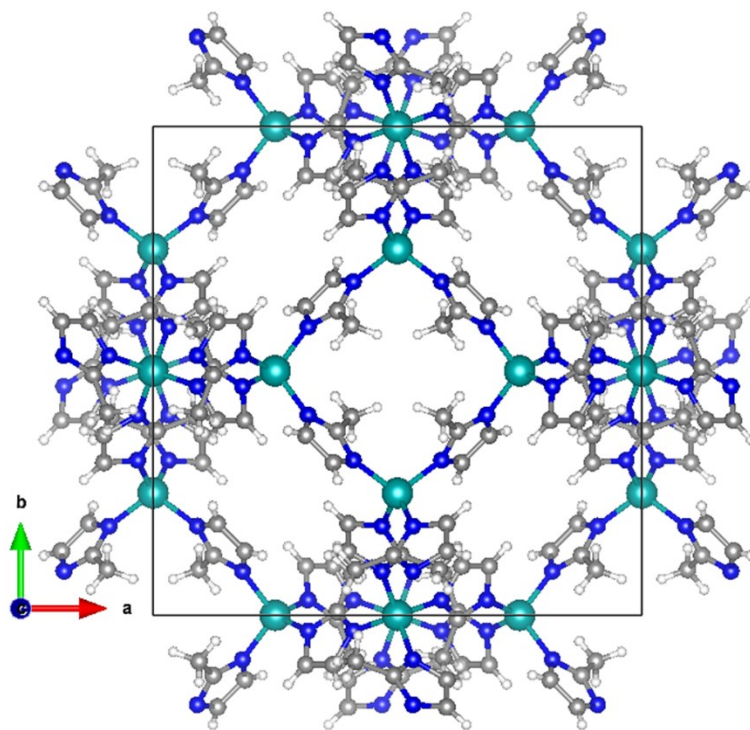

**Fig. S2** Non-optimized ZIF-8 crystal structure obtained from experimental data<sup>1</sup>

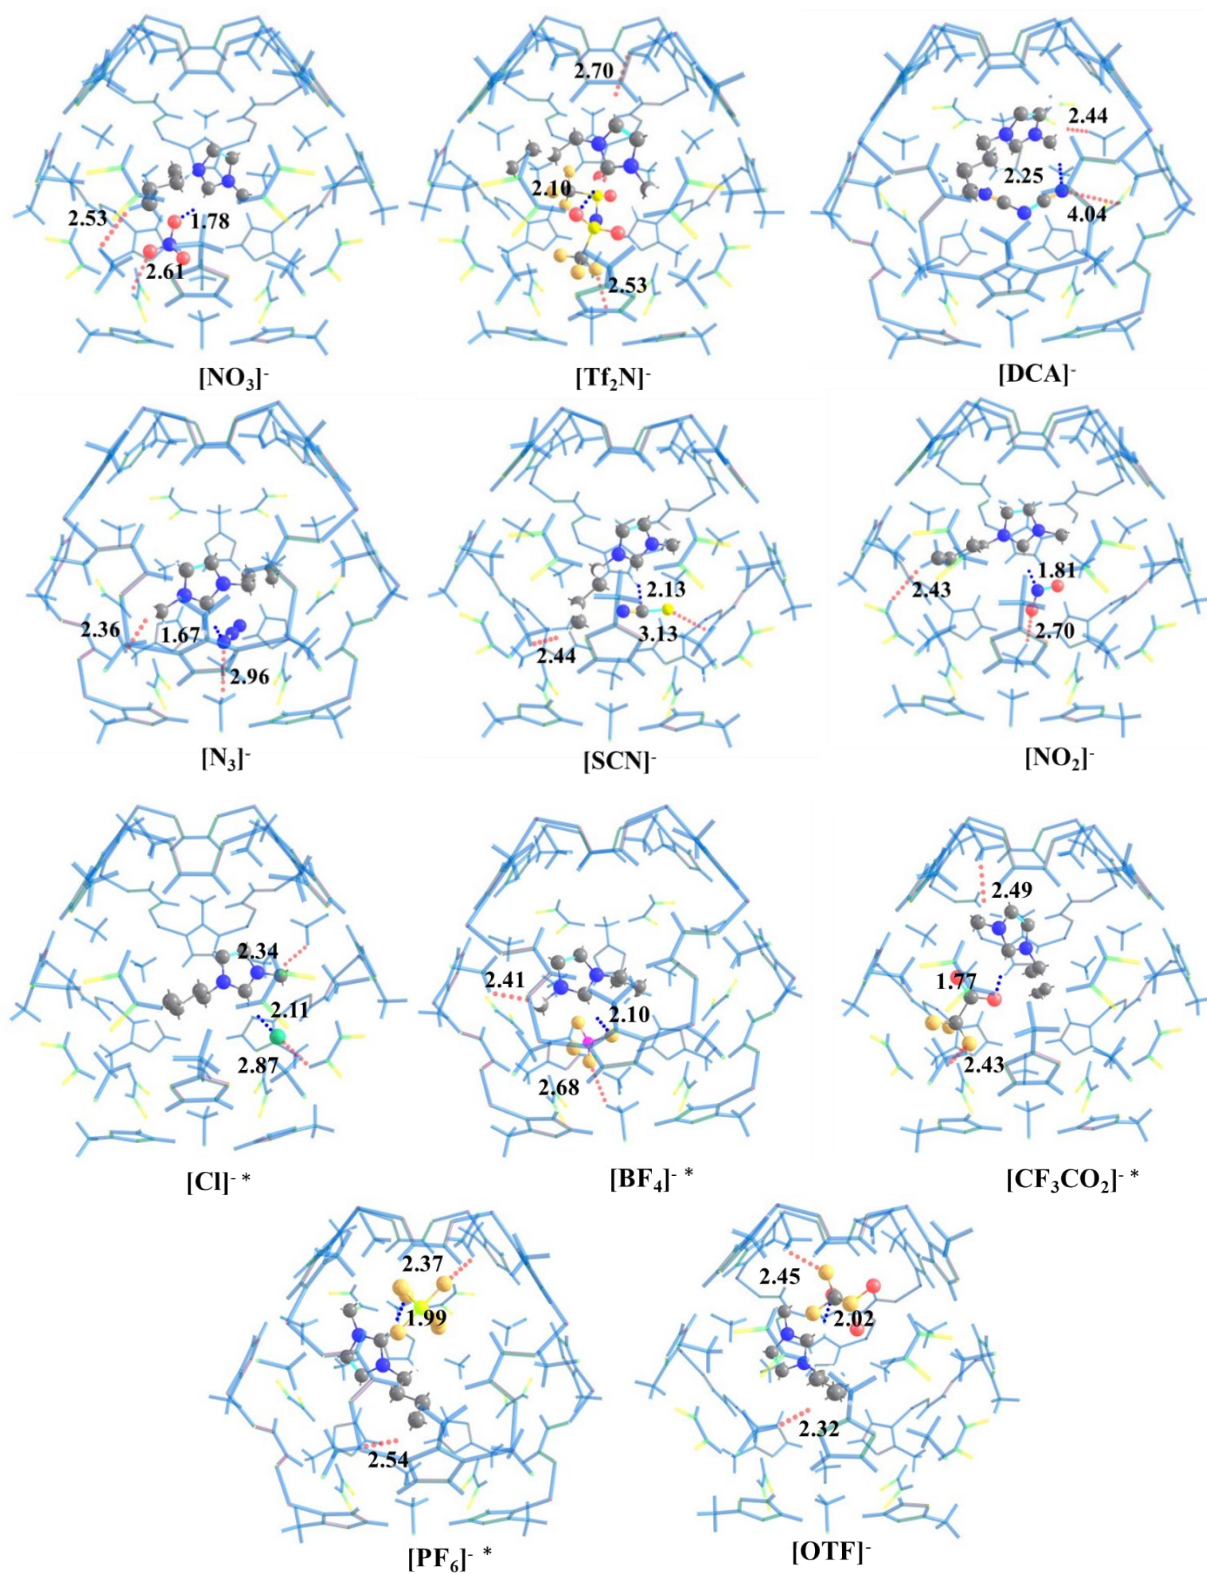

**Fig. S3** Optimized geometries of different [BMIM][X]@ZIF-8 complexes with shortest interaction distances. Blue and red dotted lines indicates IL-IL and IL-ZIF-8 distances, respectively. (\*Ref. no: 36)



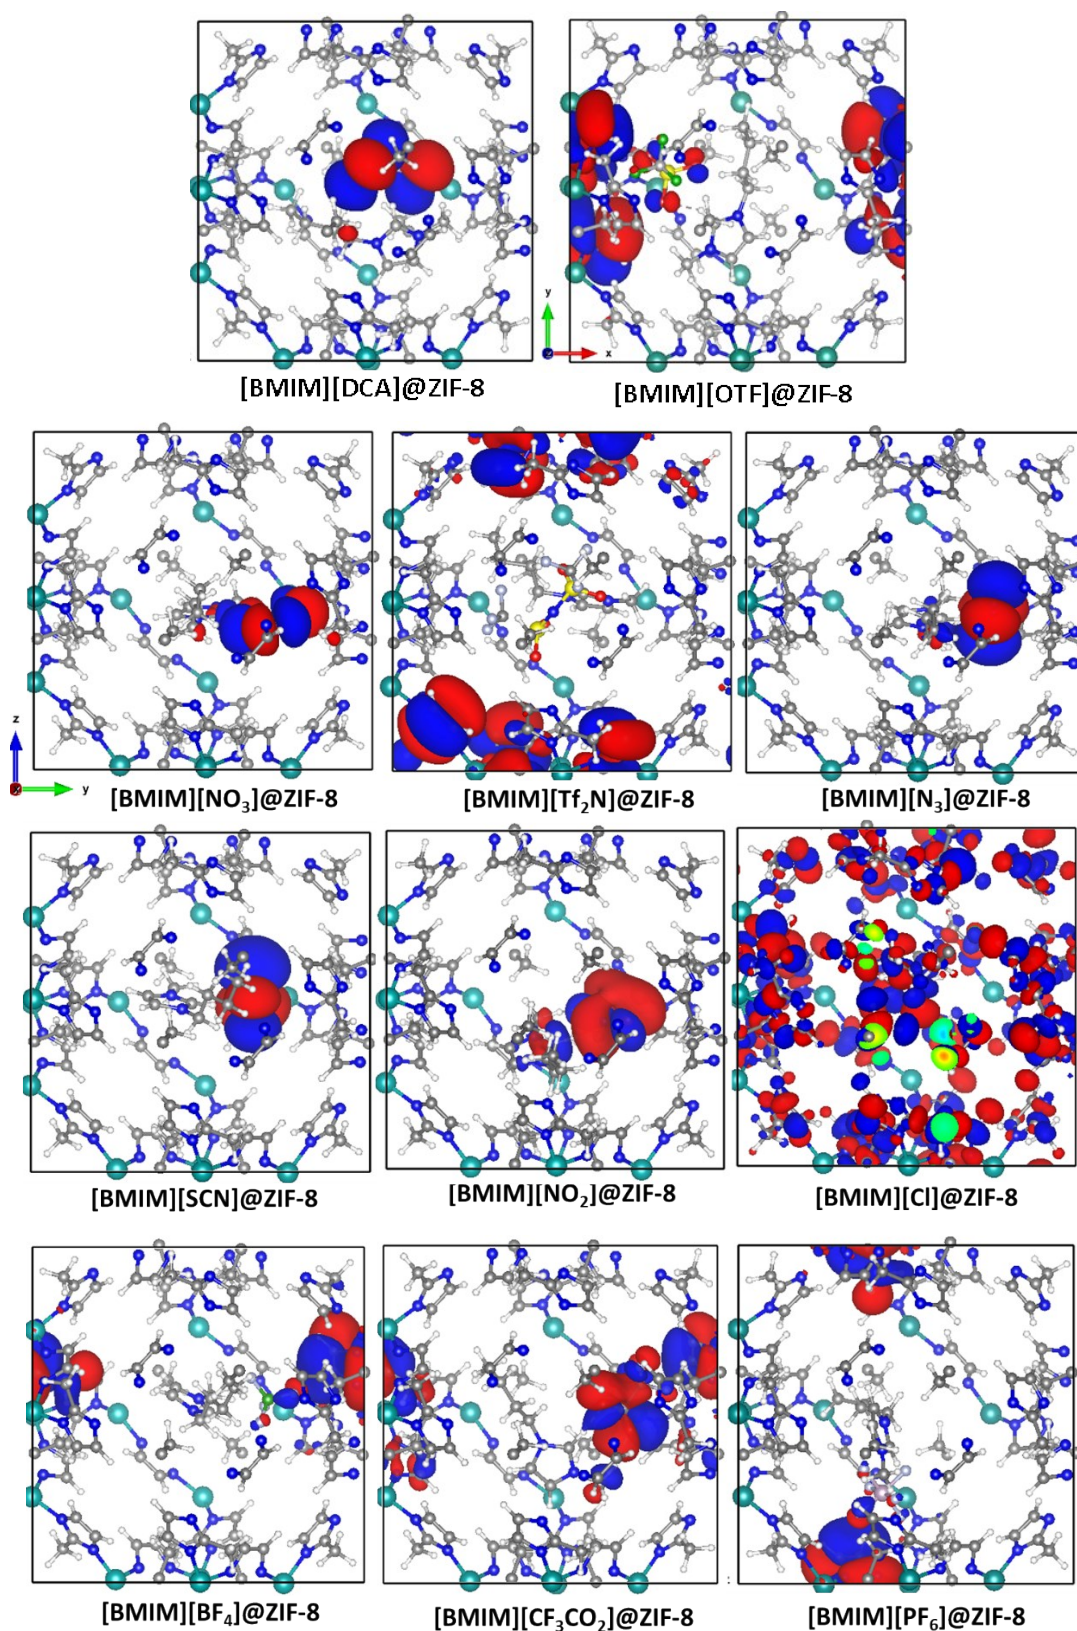

**Fig. S4** Electron density maps of various nitrogen and non-nitrogen based ILs@ZIF-8 nanopore structure used in this study (isosurface value=0.01 a.u.).

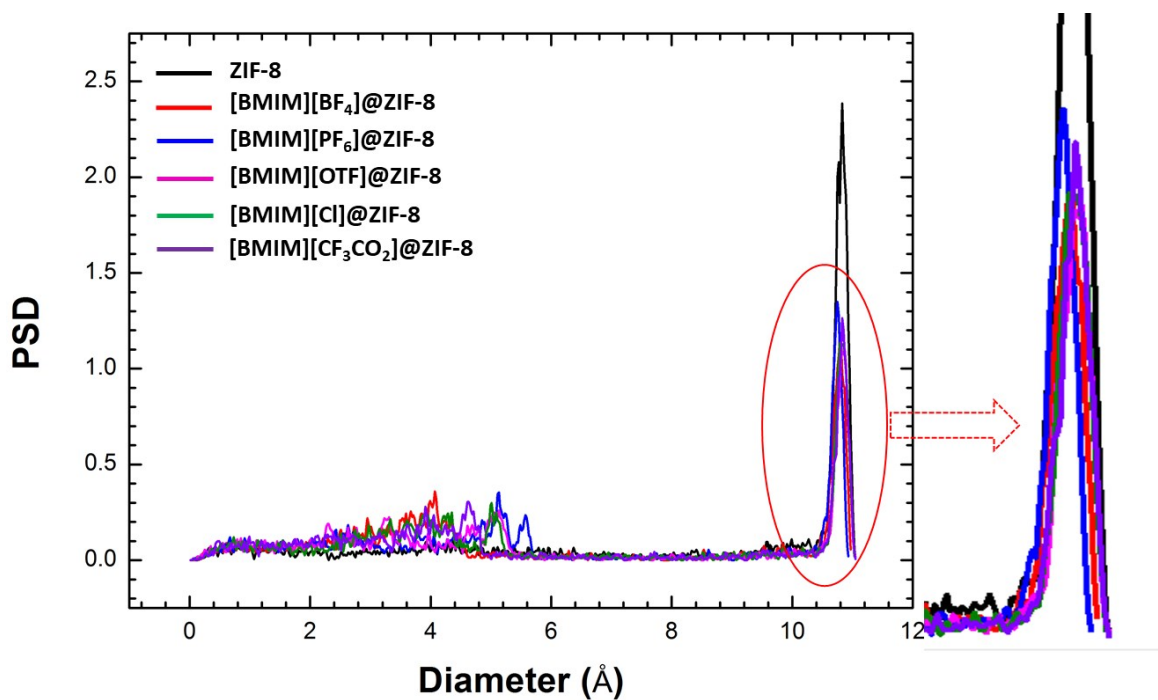

**Fig. S5** Pore-size distribution of pristine ZIF-8 and different non N-based composite materials.

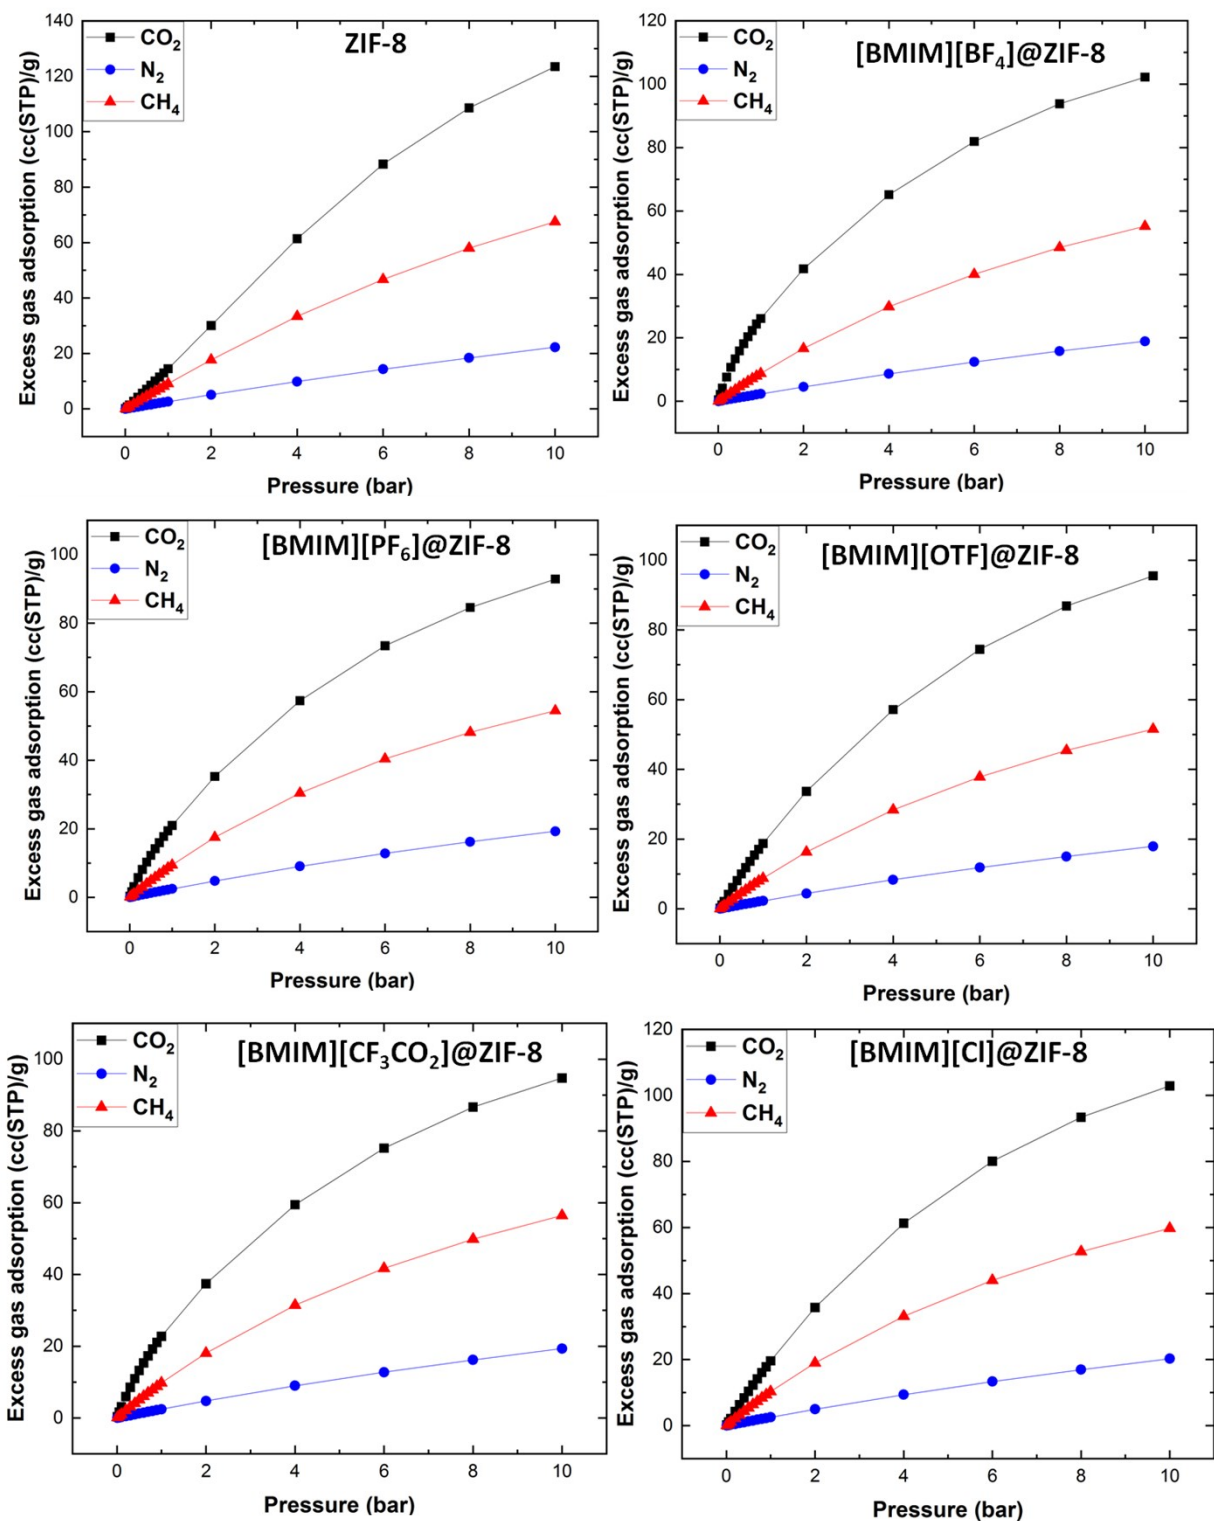

**Fig. S6** Single component adsorption isotherms for CO<sub>2</sub>, N<sub>2</sub> and CH<sub>4</sub> gases in ZIF-8 and various non-N anionic complexes, calculated using Dreiding force field.

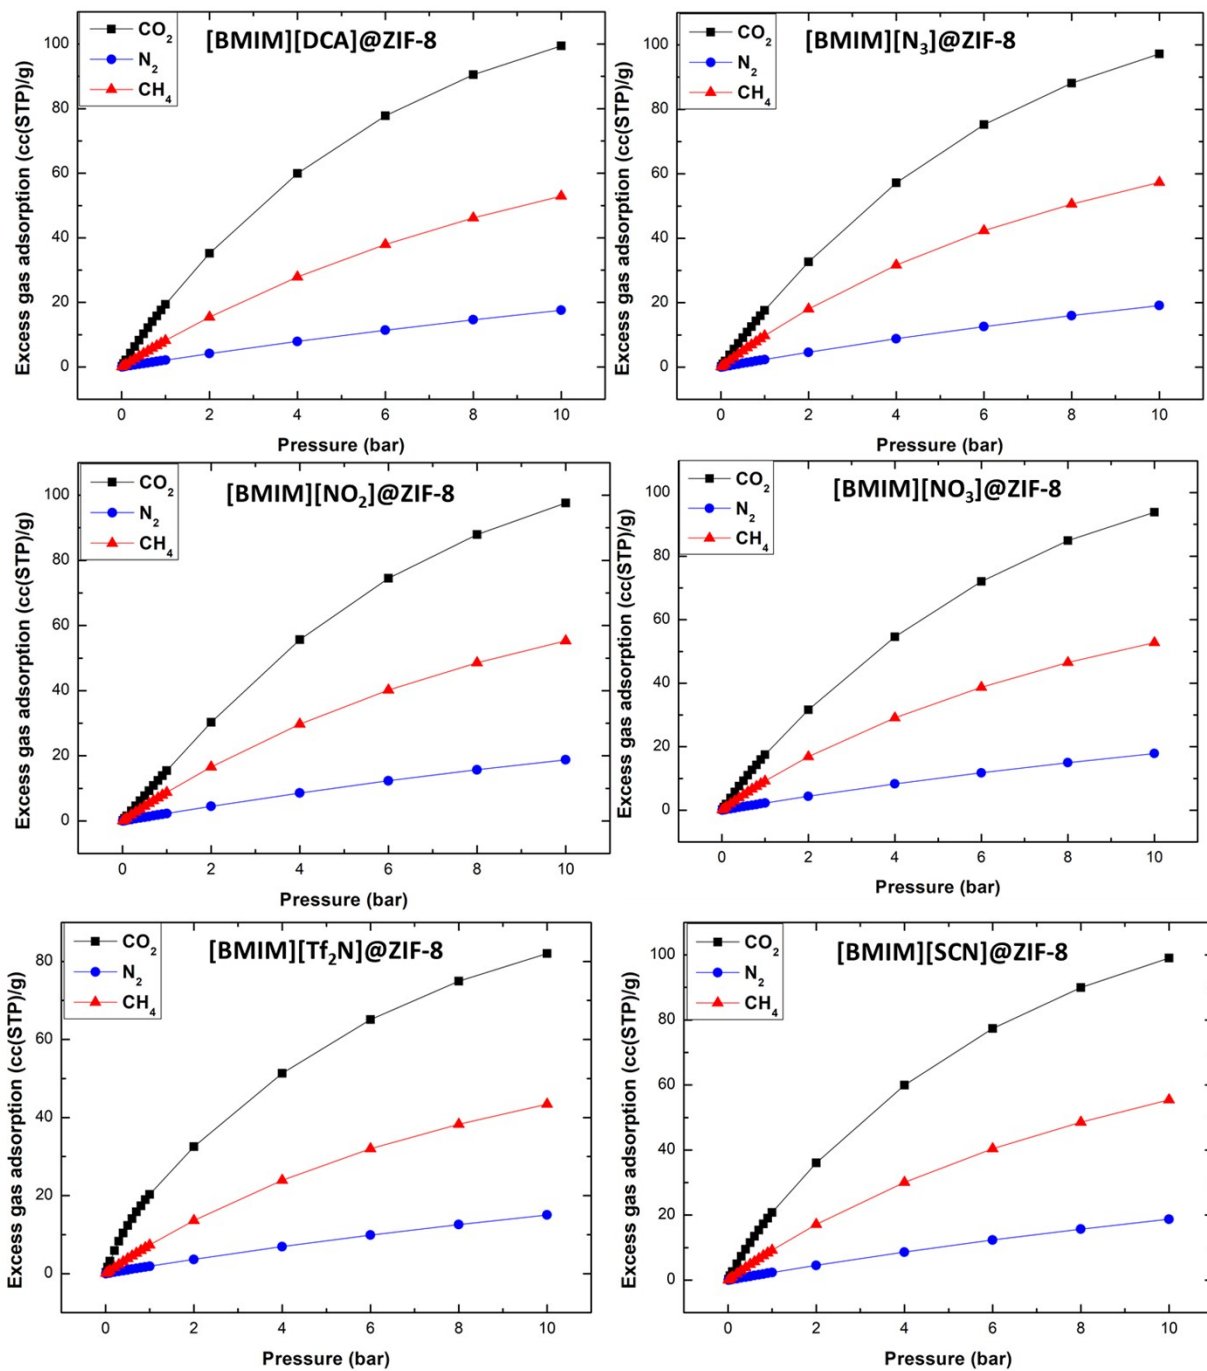

**Fig. S7** Single component adsorption isotherms for CO<sub>2</sub>, N<sub>2</sub> and CH<sub>4</sub> in different N-based complexes

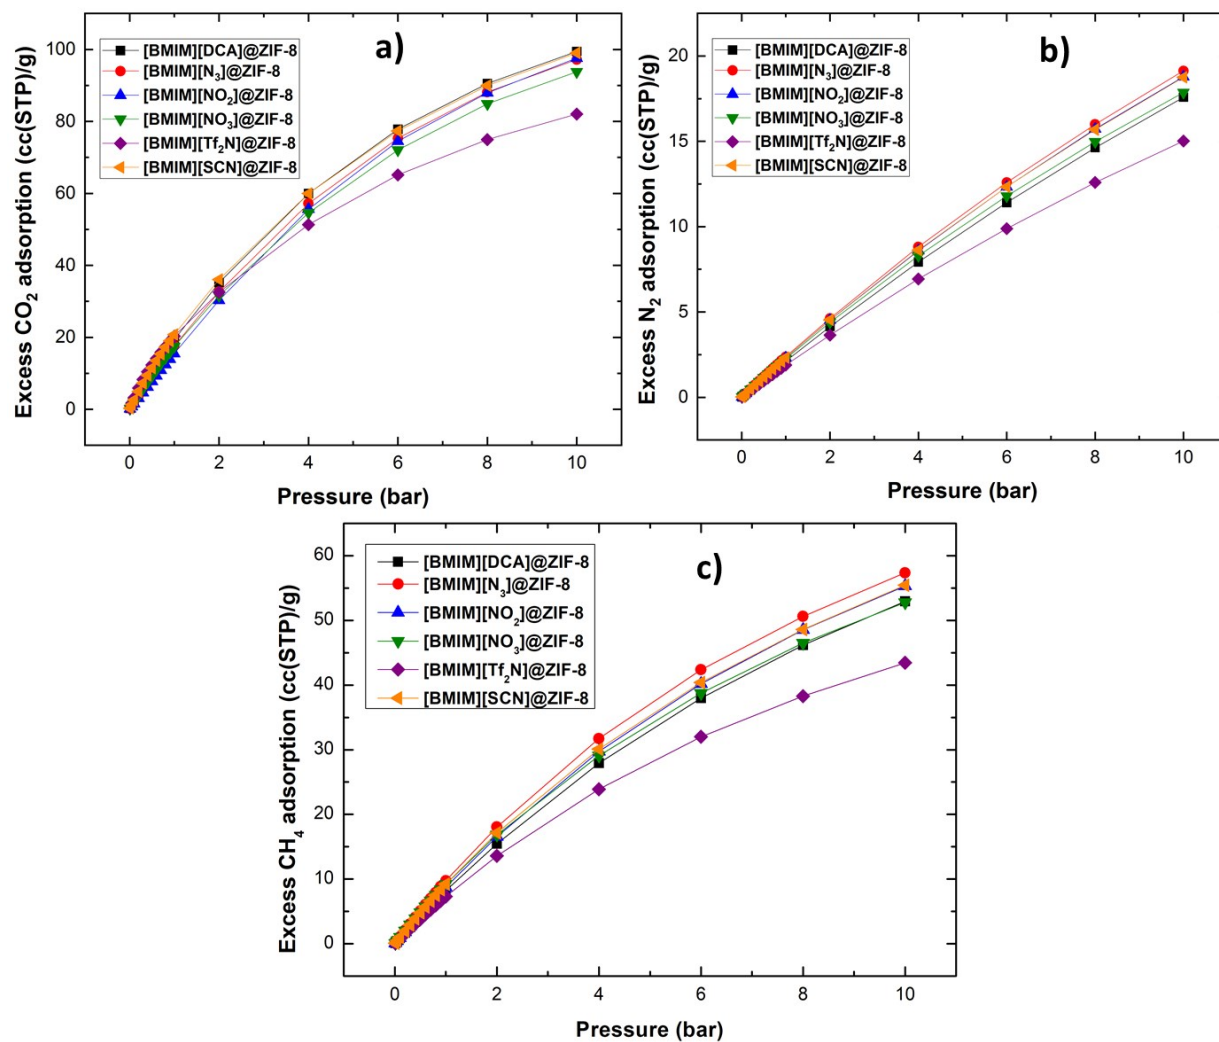

**Fig. S8** Comparison of gas adsorption isotherm of N based anionic ILs@ZIF-8 composites were calculated using Dreiding force field for (a) CO<sub>2</sub>, (b) N<sub>2</sub> and (c) CH<sub>4</sub>.

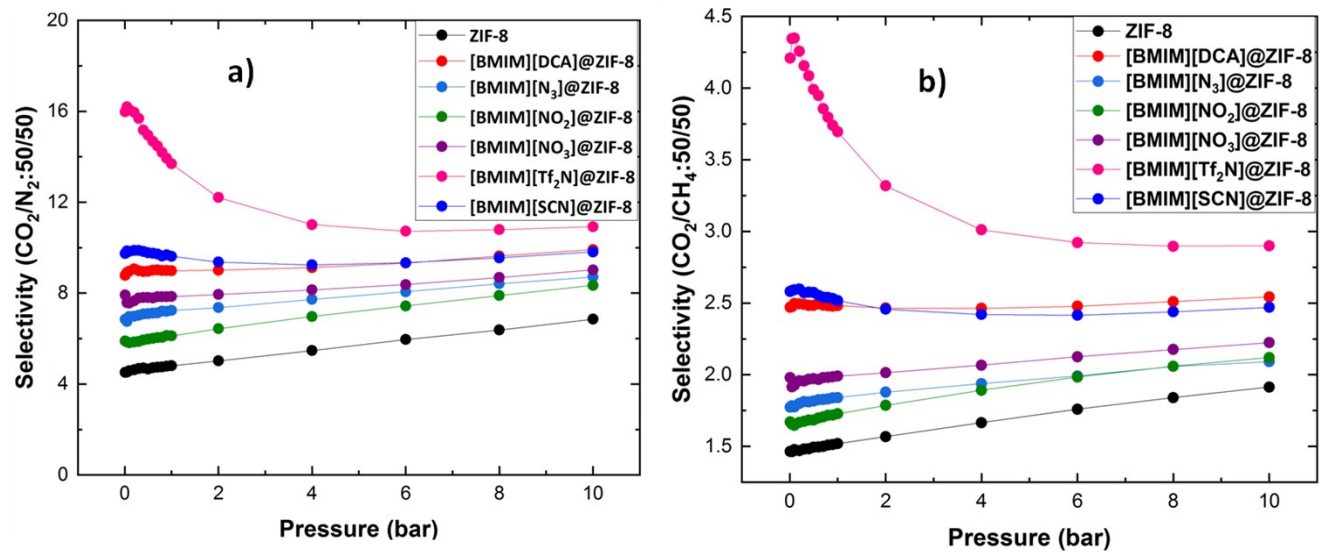

**Fig. S9** Binary mixture selectivity of different N-based ILs incorporated with ZIF-8 materials for (a) CO<sub>2</sub>/N<sub>2</sub> and (b) CO<sub>2</sub>/CH<sub>4</sub>.

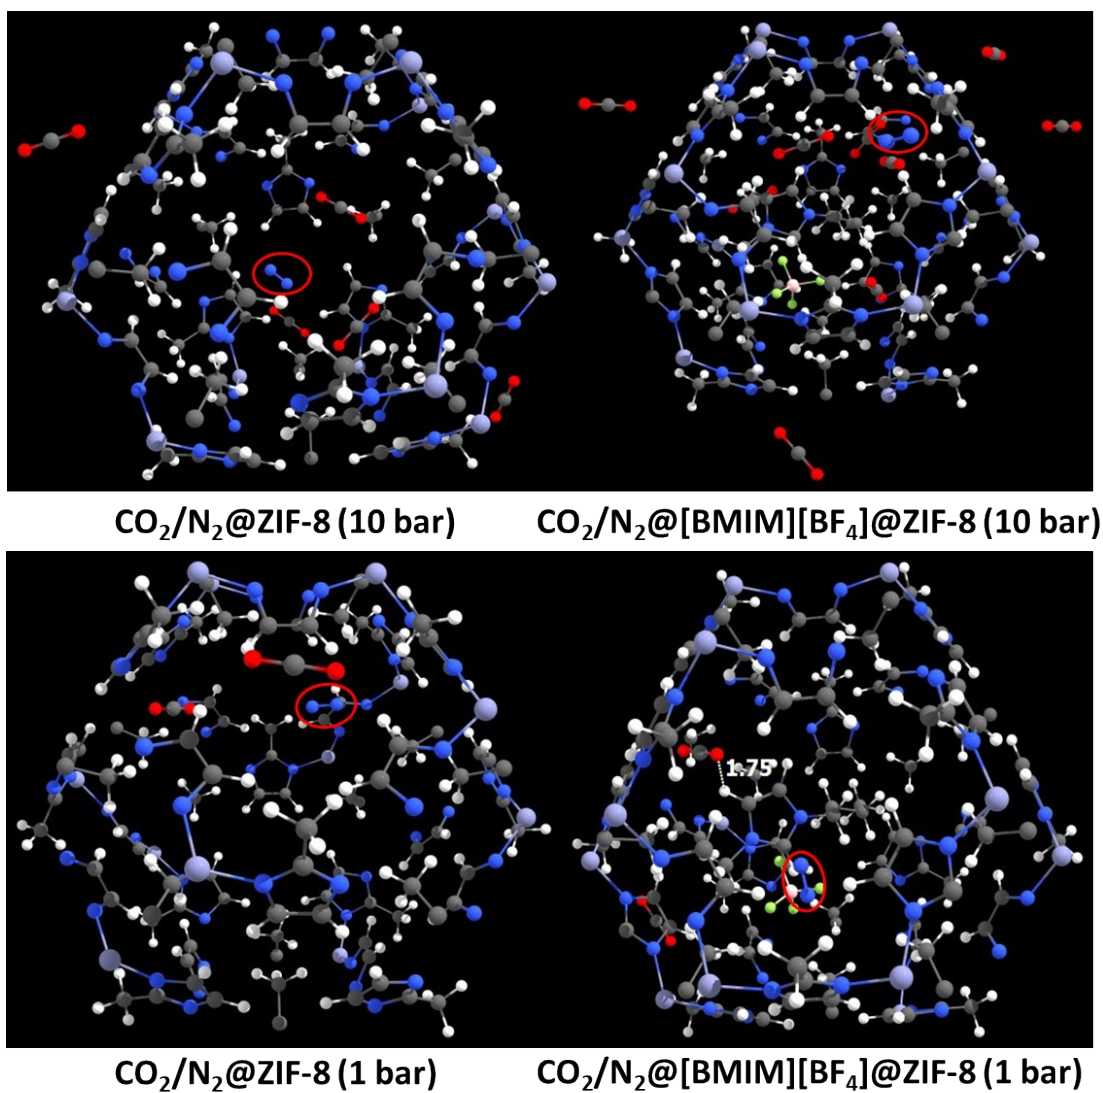

**Fig. S10** Snapshots from the binary mixture ( $\text{CO}_2/\text{N}_2$ ) adsorption of ZIF-8 and  $[\text{BMIM}][\text{BF}_4]@\text{ZIF-8}$  at 10 (top) and 1 bar (bottom). The  $\text{N}_2$  molecules are shown in red circles.

**References:**

- 1 K. S. Park, Z. Ni, A. P. Cote, J. Y. Choi, R. Huang, F. J. Uribe-Romo, H. K. Chae, M. O’Keeffe and O. M. Yaghi, *Proc. Natl. Acad. Sci.*, 2006, **103**, 10186–10191.
